# Supplementary material
Source: PubMed Central journal article supplement (PMC1838747)

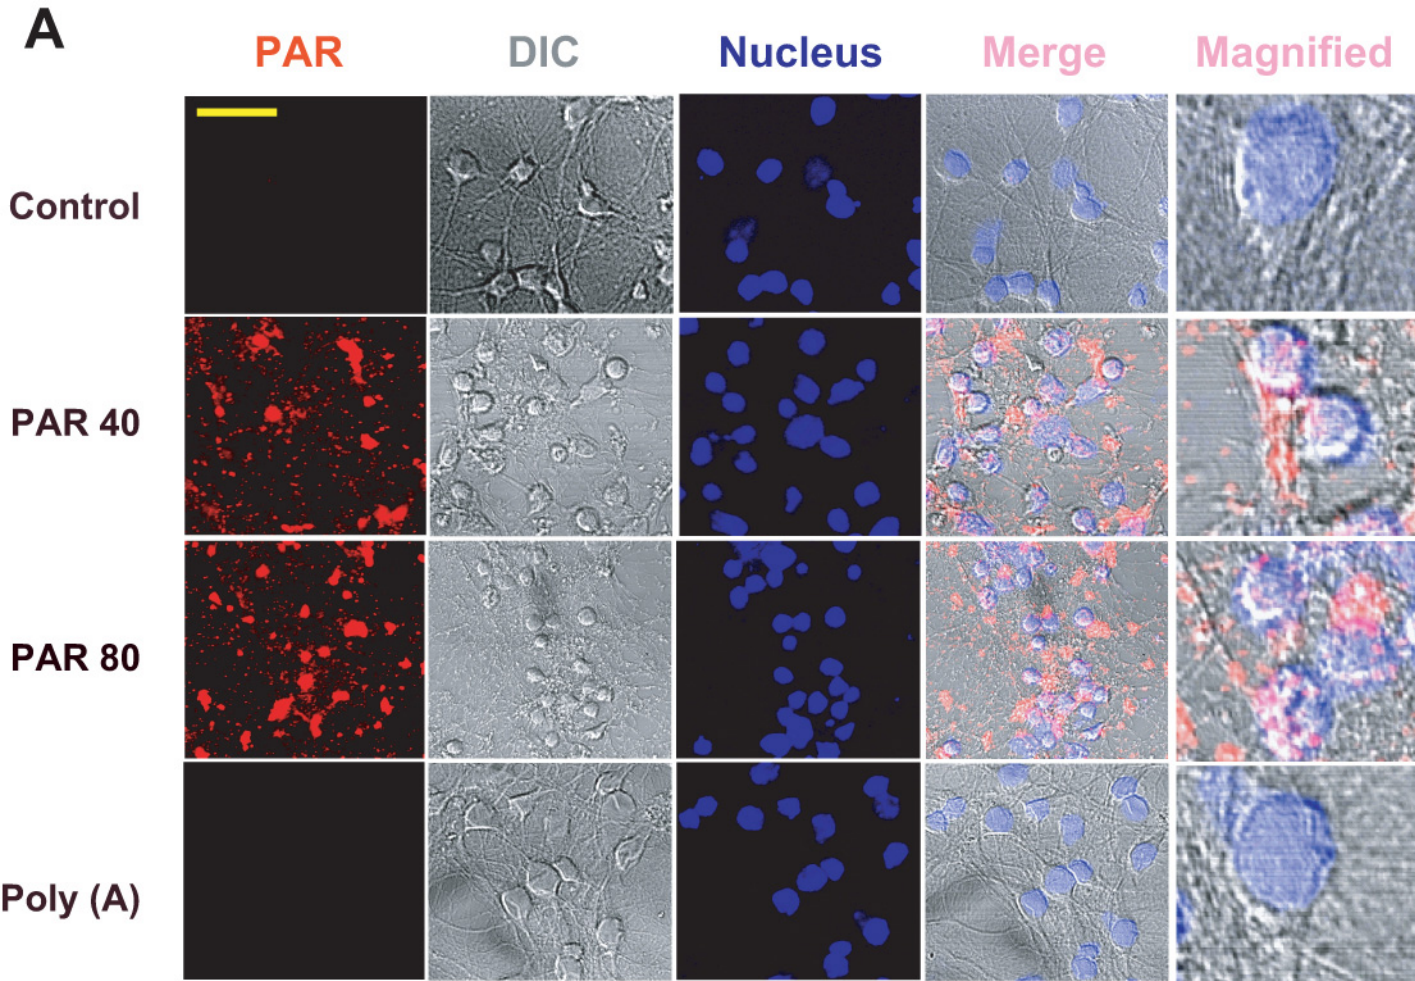

Supplement: pnas_0606526103_1.pdf [file pnas_0606526103_1.pdf]

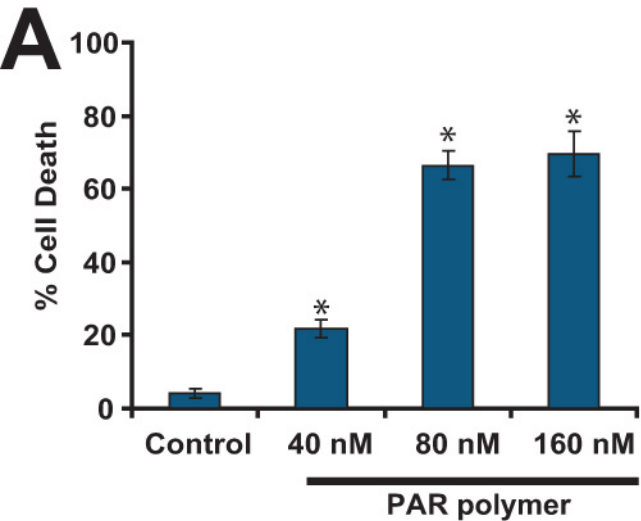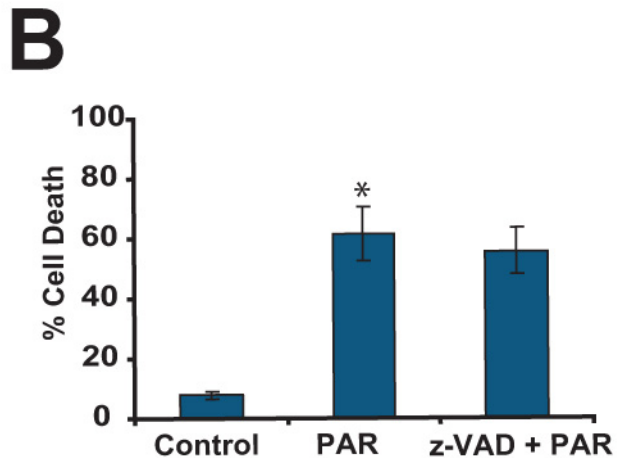

Supplement: pnas_0606526103_2.pdf [file pnas_0606526103_2.pdf]

A

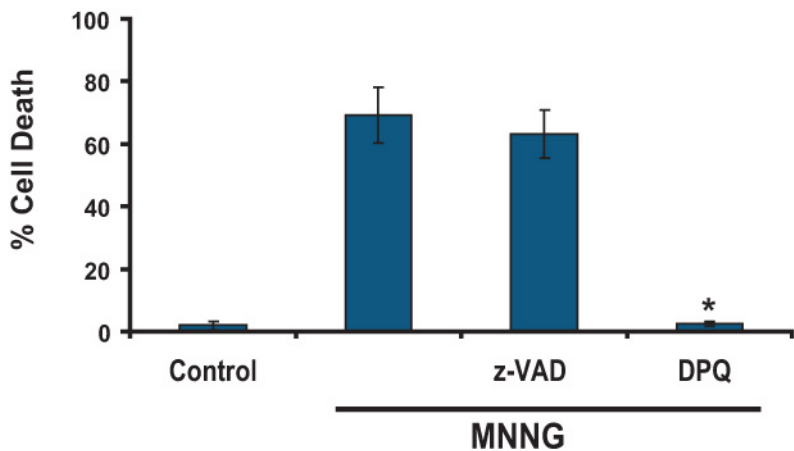

B

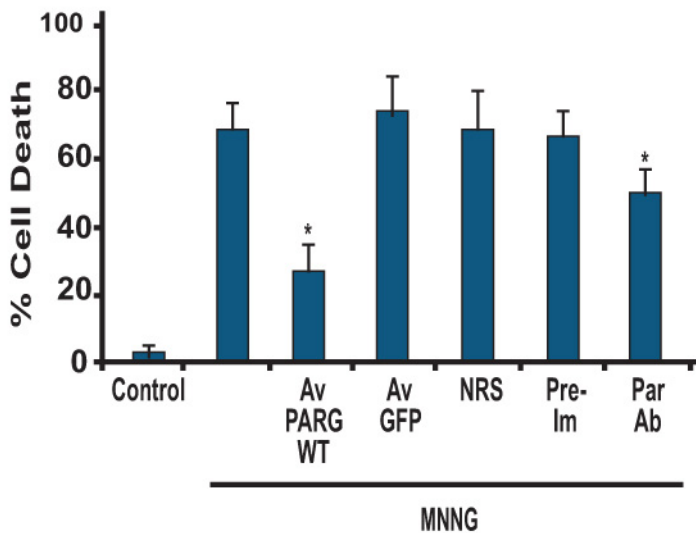

Supplement: pnas_0606526103_3.pdf [file pnas_0606526103_3.pdf]

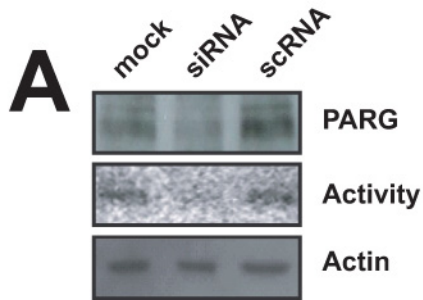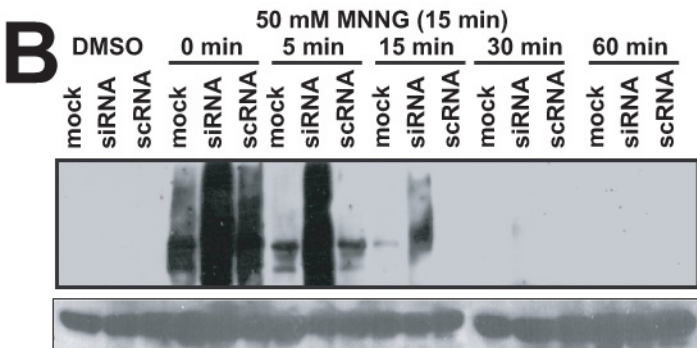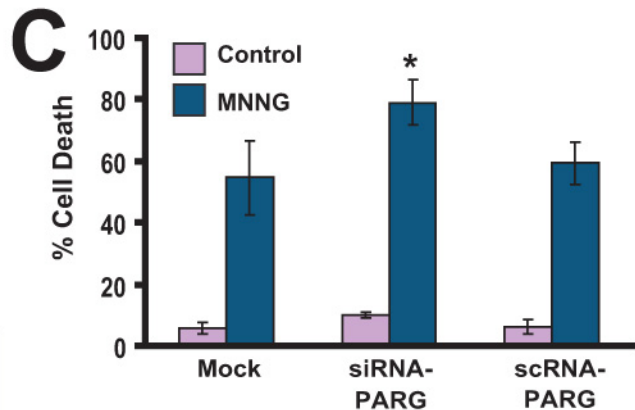

Supplement: pnas_0606526103_4.pdf [file pnas_0606526103_4.pdf]
